# Supplementary material for: GB3.0: a platform for plant bio-design that connects functional DNA elements with associated biological data
Source: Oxford University Press journal article supplement (doi:10.1093/nar/gkw1326), 2016-12-21
Supplement: gkw1326_supplementary_data.zip [file gkw1326_supplementary_data.zip]

# Supplementary Figure 1

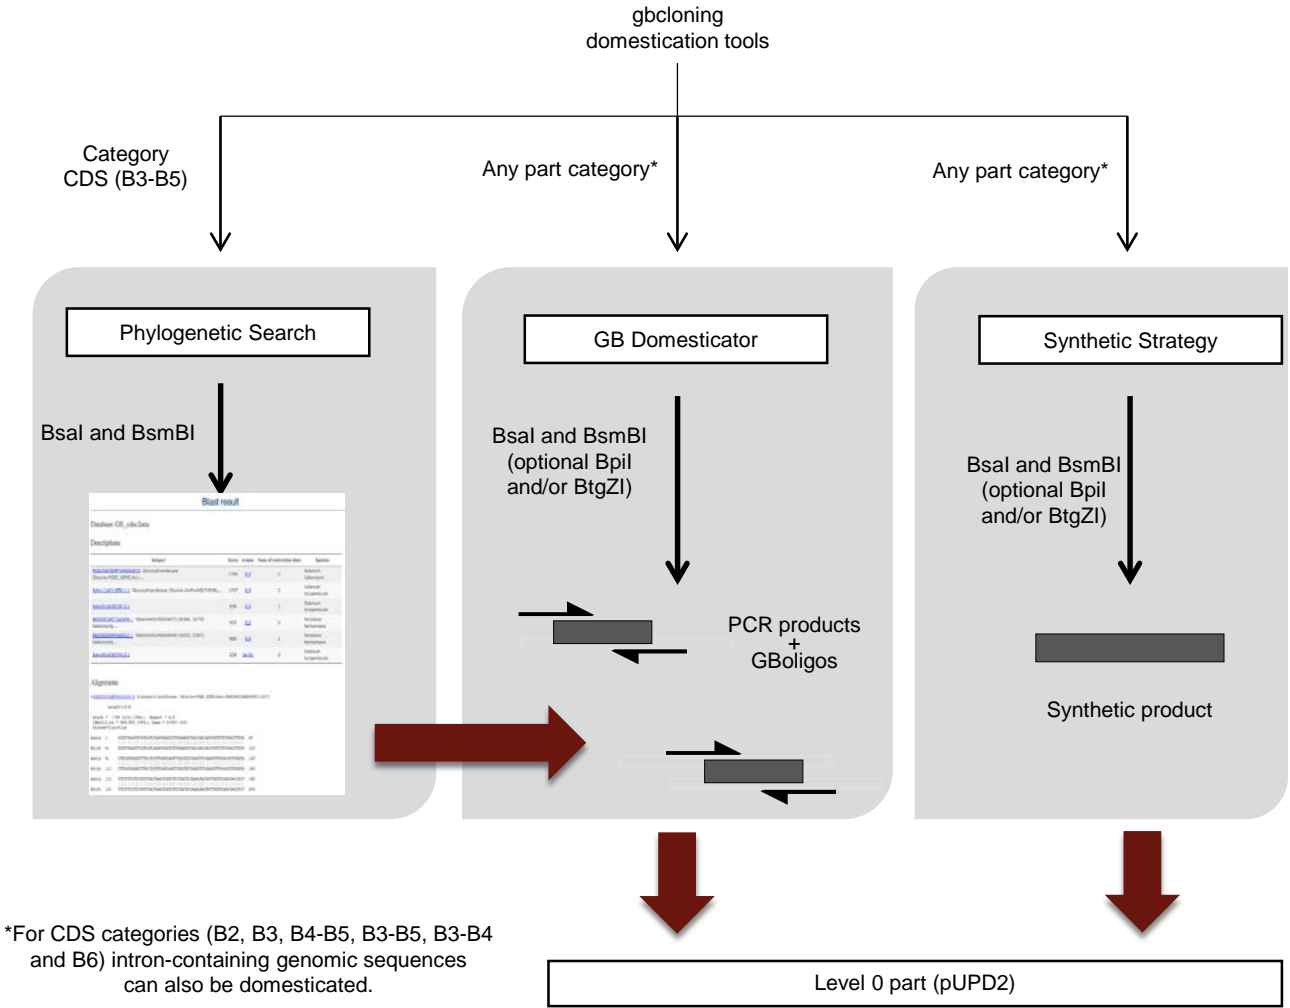

\*For CDS categories (B2, B3, B4-B5, B3-B5, B3-B4 and B6) intron-containing genomic sequences can also be domesticated.

## Supplementary Figure 1. GB3.0 domestication tools workflow.

The Phylogenetic Search Tool offers sequence retrieval of the best hits with minimal internal restriction sites from a Blast search in a coding sequences database. Upon sequence election, it offers connection with the GBDomesticator. The GB Domesticator provides the list of the PCR products and GB oligos required for part domestication while the Synthetic Strategy Tool provides directly the synthetic product to be ordered. The GB Domesticator and the Synthetic Strategy Tool offer in this new version the possibility of domesticating intron containing genomic sequences when the introns are written in lowercase in the input file. They also offer the choice to domesticate the sequences not only for Bsal and BsmBI but also for Bpil and/or BtgZI. All domestication tools generate a GenBank file with the level 0 part cloned into the pUPD2.

## Supplementary Figure 2

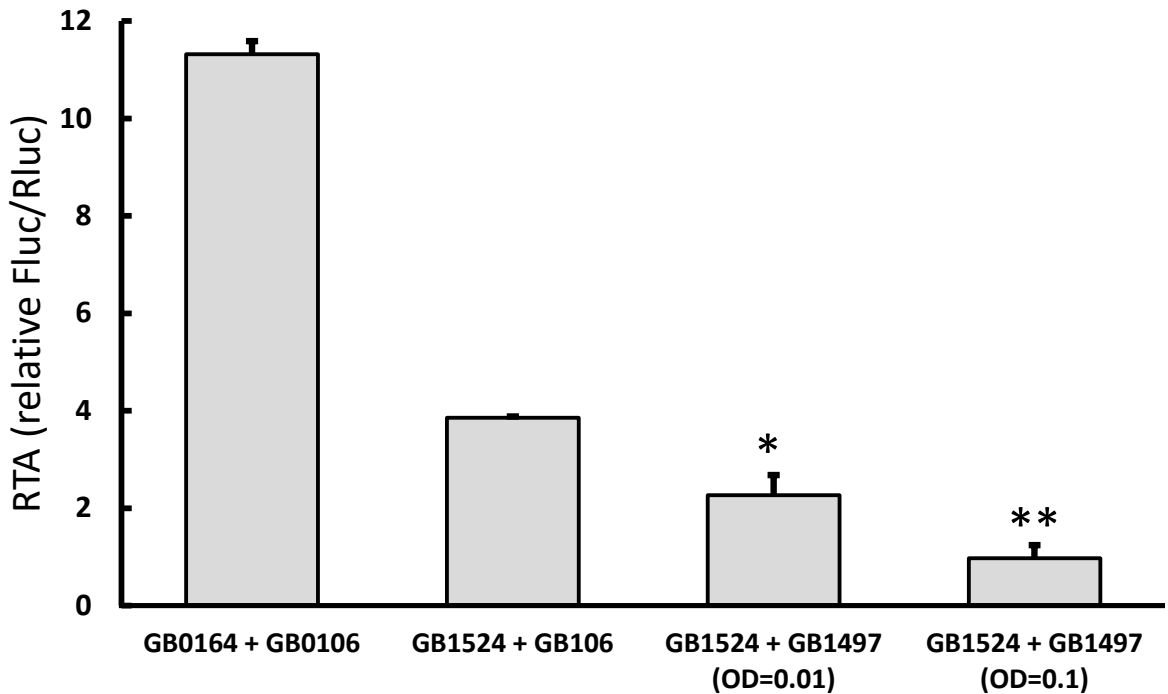

### Supplementary Figure 2. Repression modulation related to optical density ( $OD_{600}$ ) in transient expression assays.

Increasing  $OD_{600}$  levels of *Agrobacterium* cultures expressing phiC31 recombinase have a direct repression effect on the reporter construct GB1524 comprising the CaMV 35S promoter with an *attR* site inserted immediately downstream of the TSS, followed by Luciferase/Renilla reporter system. GB0164 is a control construct comprised of the CaMV 35S promoter, without inserted *attR* sequence, followed by the Luc/Ren reporter system. GB0106 represents a stuffer fragment used to equalize *Agrobacterium* culture concentrations. GB1497 contains a constitutive transcriptional unit for phiC31 integrase expression. All relative transcriptional activities are expressed as relative promoter units calculated normalizing Luciferase/Renilla (L/R) ratios to GB1116. Error bars represent standard deviation of L/R ratios determined on 3 independent samples (\* P-value < 0.05, \*\* P-value < 0.01)

**Table S1. Experimental conditions.**

| Experiment type                                     | Mandatory experimental conditions                                                                                                                                                                                                                                                                                                                                                                                                                                                                                                                                                                                                                                                                                                                                                  | Recommended experimental conditions                                                                                                                                                                                                                                                                                        | Quantitative output                                                                                                                                                                                                                                                                                                                                 |
|-----------------------------------------------------|------------------------------------------------------------------------------------------------------------------------------------------------------------------------------------------------------------------------------------------------------------------------------------------------------------------------------------------------------------------------------------------------------------------------------------------------------------------------------------------------------------------------------------------------------------------------------------------------------------------------------------------------------------------------------------------------------------------------------------------------------------------------------------|----------------------------------------------------------------------------------------------------------------------------------------------------------------------------------------------------------------------------------------------------------------------------------------------------------------------------|-----------------------------------------------------------------------------------------------------------------------------------------------------------------------------------------------------------------------------------------------------------------------------------------------------------------------------------------------------|
| <b>SE_001</b><br>Promoter strength tested in discs  | <ul style="list-style-type: none"> <li>- Plant species: <i>N.benthamiana</i>.</li> <li>- <u>Chassis</u>: Agroinfiltrated leaves of 5-6 weeks old <i>N.benthamiana</i> plants.</li> <li>- <u>Constructs</u>: tested constructs must include the Luc gene as reporter (GB0096) and the 35s:Renilla:Tnos transcriptional unit in cis. The silencing suppressor P19 must be coinfiltrated either in cis or in trans.</li> <li>- <u>Sampling</u>: collect discs (0.8 cm in diameter) at 3 days post infiltration.</li> <li>- <u>Analysis</u>: keep the discs on plates with/without chemical inductor and take samples at different times.</li> <li>- <u>Data normalization</u>: normalize the data with the values obtained for GB1116 in the same experimental conditions.</li> </ul> | <ul style="list-style-type: none"> <li>- <u>Plant growth conditions</u>: 24°C/20°C 16h light / 8h darkness.</li> <li>- <u>Sampling</u>: collect replicas from 3 independent agroinfiltrated leaves.</li> <li>- <u>Analysis</u>: use the Dual-Glo® Luciferase Assay System (Promega) for the luminiscence assay.</li> </ul> | <ul style="list-style-type: none"> <li>- RTA at 0h.</li> <li>- RTA at 4h.</li> <li>- RTA at 8h.</li> <li>- RTA at 12h.</li> <li>- RTA at 18h.</li> <li>- RTA at 24h.</li> <li>- RTA at 36h.</li> <li>- RTA at 48h.</li> </ul> <p>All relative transcriptional activities (RTA) have to be expressed in rpu (relative promoter units to GB1116).</p> |
| <b>SE_002</b><br>Promoter strength tested in leaves | <ul style="list-style-type: none"> <li>- Plant species: <i>N.benthamiana</i>.</li> <li>- <u>Chassis</u>: Agroinfiltrated leaves of 5-6 weeks old <i>N.benthamiana</i> plants.</li> <li>- <u>Constructs</u>: tested constructs must include the Luc gene as reporter (GB0096) and the 35s:Renilla:Tnos transcriptional unit in cis. The silencing suppressor P19 must be coinfiltrated either in cis or in trans.</li> <li>- <u>Sampling</u>: collect discs (0.8 cm in diameter) at 4 days post infiltration for analysis.</li> <li>- <u>Data normalization</u>: normalize the data with the values obtained for GB1116 in the same experimental conditions.</li> </ul>                                                                                                             | <ul style="list-style-type: none"> <li>- <u>Plant growth conditions</u>: 24°C/20°C 16h light / 8h darkness.</li> <li>- <u>Sampling</u>: collect replicas from 3 independent agroinfiltrated leaves.</li> <li>- <u>Analysis</u>: use the Dual-Glo® Luciferase Assay System (Promega) for the luminiscence assay.</li> </ul> | <ul style="list-style-type: none"> <li>- RTA (in rpu)</li> </ul> <p>Relative transcriptional activity (RTA) has to be expressed in rpu (relative promoter units to GB1116).</p>                                                                                                                                                                     |
| <b>SE_003</b><br>Transformation efficiency          | <ul style="list-style-type: none"> <li>- <u>Analysis</u>: calculate the transformation efficiency by dividing the number of obtained transgenic plants by the number of inoculated explants.</li> </ul>                                                                                                                                                                                                                                                                                                                                                                                                                                                                                                                                                                            | Not defined                                                                                                                                                                                                                                                                                                                | <ul style="list-style-type: none"> <li>- % transformants</li> </ul>                                                                                                                                                                                                                                                                                 |
| <b>SE_004</b><br>Recombinant protein production     | <ul style="list-style-type: none"> <li>- Plant species: <i>N.benthamiana</i>.</li> <li>- <u>Chassis</u>: Agroinfiltrated leaves of 6-7 weeks old <i>N.benthamiana</i> plants.</li> <li>- <u>Sampling and analysis</u>: extract your protein, purify it and determine the amount of recombinant protein relative to the total amount of protein or weight of plant tissue.</li> </ul>                                                                                                                                                                                                                                                                                                                                                                                               | <ul style="list-style-type: none"> <li>- <u>Plant growth conditions</u>: 24°C/20°C 16h light / 8h darkness.</li> </ul>                                                                                                                                                                                                     | <ul style="list-style-type: none"> <li>- µg/gDW (dry weight)</li> <li>- µg/gFW (fresh weight)</li> <li>- %TSP (total soluble protein)</li> </ul>                                                                                                                                                                                                    |
| <b>SE_005</b><br>CRISPR target efficiency           | <ul style="list-style-type: none"> <li>- <u>Constructs</u>: tested constructs must include a Cas gene together with at least one single guideRNA (sgRNA).</li> <li>- <u>Analysis</u>: determine the efficiency calculating the percentage of mutated genomic DNA (for transient expression) or the number of plants with mutations in reference to the total number of transgenic plants (for stable transformation).</li> </ul>                                                                                                                                                                                                                                                                                                                                                   | Not defined                                                                                                                                                                                                                                                                                                                | <ul style="list-style-type: none"> <li>- Overall mutations efficiency (%)</li> </ul>                                                                                                                                                                                                                                                                |
| <b>NS_000</b><br>Non-standard experiment            | Not defined                                                                                                                                                                                                                                                                                                                                                                                                                                                                                                                                                                                                                                                                                                                                                                        | Not defined                                                                                                                                                                                                                                                                                                                | Not defined                                                                                                                                                                                                                                                                                                                                         |

**Table S2. Non-exhaustive list of GBexperiments.**

\*All listed experiments can be consulted at <https://gbcloning.upv.es/search/experiment/> by introducing the 'Experiment IDs'. Extra experiments can be searched on the same link by using different search criteria.

| Title                                                             | Short description                                                                                                                                                                                                                                                               | Experiment type | GB elements                             | Experiment IDs                                                                                                                          |
|-------------------------------------------------------------------|---------------------------------------------------------------------------------------------------------------------------------------------------------------------------------------------------------------------------------------------------------------------------------|-----------------|-----------------------------------------|-----------------------------------------------------------------------------------------------------------------------------------------|
| Dexamethasone dose-response                                       | Study of the inducibility factor of a genetic element inducible by dexamethasone at different dexamethasone concentrations.                                                                                                                                                     | SE_001          | GB0162                                  | GB_EXP_3F,<br>GB_EXP_40,<br>GB_EXP_41,<br>GB_EXP_42,<br>GB_EXP_43,<br>GB_EXP_45,<br>GB_EXP_47,<br>GB_EXP_49,<br>GB_EXP_4A,<br>GB_EXP_4B |
| Dexamethasone time-course                                         | Determination of the induction profile of a genetic element inducible by dexamethasone.                                                                                                                                                                                         | SE_001          | GB1254                                  | GB_EXP_7A,<br>GB_EXP_7B                                                                                                                 |
| Estradiol dose-response                                           | Study of the inducibility factor of a genetic element inducible by estradiol with different $\beta$ -estradiol concentrations                                                                                                                                                   | SE_001          | GB1132                                  | GB_EXP_36,<br>GB_EXP_37,<br>GB_EXP_38,<br>GB_EXP_3A,<br>GB_EXP_3B,<br>GB_EXP_3C,<br>GB_EXP_3D,<br>GB_EXP_3E                             |
| Transactivation with a synthetic transcription factor time-course | Determination of the levels of activation of a regulated promoter with either the constitutive or self-regulated expression of a synthetic transcription factor                                                                                                                 | SE_001          | GB1118,<br>GB1121,<br>GB1122,<br>GB1124 | GB_EXP_1A,<br>GB_EXP_17,<br>GB_EXP_18,<br>GB_EXP_19                                                                                     |
| Regulated transactivation of the SIDFR promoter time-course       | Determination of the transcriptional activity induced by the <i>Solanum lycopersicum</i> DFR promoter when it is coexpressed with a MYB and a bHLH transcription factors (Rosea1 and Delila) either constitutively expressed or regulated.                                      | SE_001          | GB1160,<br>GB0129,<br>GB1156,<br>GB1157 | GB_EXP_87,<br>GB_EXP_90,<br>GB_EXP_8C,<br>GB_EXP_8D,<br>GB_EXP_8E,<br>GB_EXP_8F                                                         |
| Expression of the 35s constitutive promoter                       | Determination of the transcriptional activity induced by the 35s promoter over different experiments to test the stability of its expression and the reproducibility of the employed experimental method                                                                        | SE_001          | GB0164                                  | GB_EXP_2D,<br>GB_EXP_2E,<br>GB_EXP_2F,<br>GB_EXP_33,<br>GB_EXP_26                                                                       |
| Expression of the 35s constitutive promoter                       | Determination of the transcriptional activity induced by the 35s promoter over different experiments to test the stability of its expression and the reproducibility of the employed experimental method                                                                        | SE_001          | GB1119                                  | GB_EXP_34,<br>GB_EXP_35,<br>GB_EXP_16                                                                                                   |
| Transactivation induced by the TEV protease                       | Test of the ability of the TEV protease constitutively expressed to release a synthetic transcription factor from a transmembrane protein.                                                                                                                                      | SE_002          | GB0588<br>GB0594                        | GB_EXP_24<br>GB_EXP_25                                                                                                                  |
| Protein-protein interaction determined with the split-TEV system  | Test of the interaction of two proteins fused to the N-term and C-term domains of the TEV protease by measuring expression from a promoter that is activated by a synthetic transcription factor released from a transmembrane protein upon reconstitution of the TEV protease. | SE_002          | GB0592<br>GB0593                        | GB_EXP_22,<br>GB_EXP_23                                                                                                                 |

**Table S2 (continuation). Non-exhaustive list of GBexperiments.**

| Title                                                                         | Short description                                                                                                                                                                                                                                                                                             | Experiment type | GB elements                                                                         | Experiment IDs                                                                                                                                                                                  |
|-------------------------------------------------------------------------------|---------------------------------------------------------------------------------------------------------------------------------------------------------------------------------------------------------------------------------------------------------------------------------------------------------------|-----------------|-------------------------------------------------------------------------------------|-------------------------------------------------------------------------------------------------------------------------------------------------------------------------------------------------|
| Transactivation of two DFR promoters with plant transcription factors         | Determination of the transcriptional activity induced by the <i>Solanum lycopersicum</i> and the <i>Antirrhinum majus</i> DFR promoters when they are coexpressed with two MYB transcription factors (Rosea1 and Ant1) either alone or in combination with two bHLH transcription factors (Delila and Jaf13). | SE_002          | GB1160,<br>GB1161,<br>GB0125,<br>GB0126,<br>GB0127,<br>GB0128,<br>GB0129,<br>GB0130 | GB_EXP_4D,<br>GB_EXP_51,<br>GB_EXP_54,<br>GB_EXP_55,<br>GB_EXP_57,<br>GB_EXP_58,<br>GB_EXP_59,<br>GB_EXP_5B,<br>GB_EXP_5C,<br>GB_EXP_5D,<br>GB_EXP_5E,<br>GB_EXP_60,<br>GB_EXP_61,<br>GB_EXP_62 |
| Transcriptional activation using the CRISPR/Cas9 technology                   | Comparison of the transcriptional activation of the nopaline synthase promoter by targeting to it the dCas9 fused to the EDLL or to the VP64 activation domains with different sgRNAs either alone or combined.                                                                                               | SE_002          | GB1116,<br>GB1189,<br>GB1190,<br>GB1221,<br>GB1192,<br>GB1197,<br>GB1195,<br>GB1220 | GB_EXP_A3,<br>GB_EXP_A5,<br>GB_EXP_A6,<br>GB_EXP_A7,<br>GB_EXP_A8,<br>GB_EXP_A9,<br>GB_EXP_AB,<br>GB_EXP_AF,<br>GB_EXP_B0,<br>GB_EXP_B1                                                         |
| Transcriptional repression using the CRISPR/Cas9 technology                   | Transcriptional repression of the nopaline synthase promoter by targeting to it the dCas9 fused to the BRD or to the SRDX repressor domains with with different sgRNAs either alone or combined.                                                                                                              | SE_002          | GB1116,<br>GB1188,<br>GB1172,<br>GB1221,<br>GB1192,<br>GB1197,<br>GB1195,<br>GB1220 | GB_EXP_B2,<br>GB_EXP_B3,<br>GB_EXP_B4,<br>GB_EXP_B5,<br>GB_EXP_B6,<br>GB_EXP_B8,<br>GB_EXP_B9,<br>GB_EXP_BA,<br>GB_EXP_BB,<br>GB_EXP_BC                                                         |
| Transcriptional activation using PhiC31 integrase-based transcription factors | Comparison of the transcriptional activation driven by PhiC31 and RDF either alone or in combination fused to the Gal4 or the VP64 activation domains.                                                                                                                                                        | SE_002          | GB1580,<br>GB1563,<br>GB1567,<br>GB1576,<br>GB1577,<br>GB1497,<br>GB0106            | GB_EXP_DB,<br>GB_EXP_DA,<br>GB_EXP_D9,<br>GB_EXP_D8,<br>GB_EXP_D7,<br>GB_EXP_D6,<br>GB_EXP_D4,<br>GB_EXP_D3,<br>GB_EXP_D2,<br>GB_EXP_D1                                                         |
| Transcriptional repression using PhiC31 integrase-based transcription factors | Comparison of the transcriptional repression driven by PhiC31 and RDF either alone or in combination fused to the BRD repressor domain.                                                                                                                                                                       | SE_002          | GB1524,<br>GB1497,<br>GB1562,<br>GB1568,<br>GB0106                                  | GB_EXP_EB,<br>GB_EXP_EC,<br>GB_EXP_EE,<br>GB_EXP_EF,<br>GB_EXP_F0                                                                                                                               |

**Table S2 (continuation). Non-exhaustive list of GBexperiments.**

| Title                                                    | Short description                                                                                                                                                                                                           | Experiment type | GB elements                                                   | Experiment IDs                                                                  |
|----------------------------------------------------------|-----------------------------------------------------------------------------------------------------------------------------------------------------------------------------------------------------------------------------|-----------------|---------------------------------------------------------------|---------------------------------------------------------------------------------|
| Tomato transformation with a intragenic selection marker | Determination of the transformation efficiency obtained using a mutated version of the tomato acetolactate synthase as selection marker.                                                                                    | SE_003          | GB0830                                                        | GB_EXP_BD                                                                       |
| Recombinant antibody production                          | Comparison of the expression levels of three monoclonal antibody formats against the human tumor necrosis factor.                                                                                                           | SE_004          | GB_UA_BD1,<br>GB_UA_C27,<br>GB_UA_C29                         | GB_EXP_95,<br>GB_EXP_98,<br>GB_EXP_99                                           |
| Gene editing with the CRISPR/Cas9 technology             | Mutagenesis efficiency of the Cas9 in combination with two sgRNAs targeting each of them a different locus of the <i>N.benthamiana</i> xylosyltransferase gene.                                                             | SE_005          | GB0639,<br>GB1108                                             | GB_EXP_83,<br>GB_EXP_85,<br>GB_EXP_86                                           |
| Anthocyanins production                                  | Quantification of anthocyanins produced in transient expression by the expression of two MYB transcription factors (Rosea1 and Ant1) either alone or in combination with two bHLH transcription factors (Delila and Jaf13). | NS_000          | GB0125,<br>GB0126,<br>GB0127,<br>GB0128,<br>GB0129,<br>GB0130 | GB_EXP_BF,<br>GB_EXP_C0,<br>GB_EXP_C1,<br>GB_EXP_C2,<br>GB_EXP_C3,<br>GB_EXP_C4 |

**Table S3. List of GBelements tested under standard experimental conditions.**

\*Datasheets of all listed GBelements can be consulted at <https://gbcloning.upv.es/search/features/> by introducing their GB IDs.

|                                                         |                                                                                                                                                                                                                                                                  |
|---------------------------------------------------------|------------------------------------------------------------------------------------------------------------------------------------------------------------------------------------------------------------------------------------------------------------------|
| Protein-protein interaction                             |                                                                                                                                                                                                                                                                  |
| GB0592                                                  | Device for testing the interaction of Ros1 and SOC1 using the Split TEV system.                                                                                                                                                                                  |
| GB0593                                                  | Device for testing the interaction of FUL and SOC1 using the Split TEV system.                                                                                                                                                                                   |
| Reporter devices for transcriptional regulation studies |                                                                                                                                                                                                                                                                  |
| GB1160                                                  | Reporter device including a transcriptional unit for the expression of the Luciferase gene driven by the <i>Solanum lycopersicum</i> DFR promoter.                                                                                                               |
| GB1161                                                  | Reporter device including a transcriptional unit for the expression of the Luciferase gene driven by the <i>Antirrhinum majus</i> DFR promoter.                                                                                                                  |
| GB0178                                                  | Reporter device including a transcriptional unit for the expression of the Luciferase gene driven by a synthetic promoter including the LacI operon and the minimal 35s promoter.                                                                                |
| GB1130                                                  | Transcriptional unit for the expression of the Luciferase gene driven by a synthetic promoter including the LexA operon and the minimal 35s promoter.                                                                                                            |
| GB1116                                                  | Reporter device including a transcriptional unit for the expression of the Luciferase gene driven by the nopaline synthase promoter.                                                                                                                             |
| GB1580                                                  | Reporter device including a transcriptional unit for the expression of the Luciferase gene driven by 2xattB sites next to a minimal 35s. Inducible expression takes place upon co-expression with a TU encoding PhiC31 integrase fused to an activation domain.  |
| GB1524                                                  | Reporter device including a transcriptional unit for the expression of the Luciferase gene driven by the 35s promoter next to an attR site. Inducible repression takes place upon co-expression with a TU encoding PhiC31 integrase fused to a repressor domain. |
| Constitutive transcriptional regulation                 |                                                                                                                                                                                                                                                                  |
| GB1120                                                  | Transcriptional unit for the constitutive expression of a synthetic transcription factor conformed by the LacI DNA binding domain and the Gal4 activation domain.                                                                                                |
| GB0129                                                  | Module for the constitutive expression of the MYB transcription factor Rosea1 and the bHLH transcription factor Delila.                                                                                                                                          |
| GB0130                                                  | Module for the constitutive expression of the MYB transcription factor Ant1 and the bHLH transcription factor Jaf13.                                                                                                                                             |
| GB1497                                                  | Transcriptional unit for the constitutive expression of the PhiC31 integrase.                                                                                                                                                                                    |
| GB1563                                                  | Transcriptional unit for the constitutive expression of an orthogonal transcription factor conformed by the phiC31 integrase and the VP64 activation domain.                                                                                                     |
| GB1577                                                  | Transcriptional unit for the constitutive expression of an orthogonal transcription factor conformed by the phiC31 integrase and the Gal4 activation domain.                                                                                                     |
| GB1576                                                  | Transcriptional unit for the constitutive expression of an orthogonal transcription factor conformed by the phiC31 Recombination Directionality Factor (RDF) and the Gal4 activation domain.                                                                     |
| GB1567                                                  | Transcriptional unit for the constitutive expression of an orthogonal transcription factor conformed by the phiC31 Recombination Directionality Factor (RDF) and the VP64 activation domain.                                                                     |
| GB1562                                                  | Transcriptional unit for the constitutive expression of an orthogonal transcription factor conformed by the phiC31 integrase and the BRD repressor domain.                                                                                                       |
| GB1568                                                  | Transcriptional unit for the constitutive expression of an orthogonal transcription factor conformed by the phiC31 Recombination Directionality Factor (RDF) and the BRD repressor domain.                                                                       |

**Table S3 (continuation). List of GBElements tested under standard experimental conditions.**

|                                        |                                                                                                                                                                                                                                                                                                           |
|----------------------------------------|-----------------------------------------------------------------------------------------------------------------------------------------------------------------------------------------------------------------------------------------------------------------------------------------------------------|
| Conditional transcriptional regulation |                                                                                                                                                                                                                                                                                                           |
| GB1111                                 | Transcriptional unit for the regulated expression of a synthetic transcription factor conformed by the LacI DNA binding domain and the Gal4 activation domain.                                                                                                                                            |
| GB1156                                 | Module for the conditional expression of the MYB transcription factor Rosea1 and the constitutive expression of the bHLH transcription factor Delila including a synthetic transcription factor responsive to dexamethasone constitutively expressed.                                                     |
| GB1157                                 | Module for the conditional expression of the bHLH transcription factor Delila and the constitutive expression of the MYB transcription factor Rosea1 including a synthetic transcription factor responsive to dexamethasone constitutively expressed.                                                     |
| GB0157                                 | Transcriptional unit for the constitutive expression of a synthetic transcription factor conformed by the GR glucocorticoid receptor domain fused to the LacI DNA binding domain and the Gal4 activation domain.                                                                                          |
| GB1129                                 | Transcriptional unit for the constitutive expression of a synthetic transcription factor conformed by the ER estradiol receptor domain fused to the LexA DNA binding domain and the Gal4 activation domain.                                                                                               |
| Metabolic engineering                  |                                                                                                                                                                                                                                                                                                           |
| GB0830                                 | Device for tomato transformation expressing the <i>S.lycopersicum</i> MYB12 under the E8 fruit promoter. MYB12 is a master regulator of the flavonoids biosynthetic pathway.                                                                                                                              |
| GB0130                                 | Device for overproduction of anthocyanins in transient expression in <i>N.benthamiana</i> leaves comprising the <i>S.lycopersicum</i> MYB and bHLH transcription factors Ant1 and Jaf13.                                                                                                                  |
| CRISPR/Cas9 based gene editing         |                                                                                                                                                                                                                                                                                                           |
| GB1108                                 | Device including two monocistroninc sgRNAs targeting each of them one locus of the <i>N.benthamiana</i> xylosyltransferase gene and the constitutively expressed Cas9.                                                                                                                                    |
| GB1222                                 | Device including two polycistroninc sgRNAs, one with two targets for the two genes of the <i>N.benthamiana</i> xylosyltransferase and the second one with three sgRNAs targeting five <i>N.benthamiana</i> fucosyltransferase genes. It also includes the TU for the constitutive expression of the Cas9. |
| Recombinant antibody production        |                                                                                                                                                                                                                                                                                                           |
| GB_UA_BD1                              | Transcriptional unit for the constitutive expression of the human scFv-Fcgamma1 antibody format against the human TNF-alpha.                                                                                                                                                                              |
| GB_UA_C27                              | Transcriptional unit for the constitutive expression of a monoclonal antibody with the gamma1 heavy chain and the lambda light chain against the human TNF-alpha.                                                                                                                                         |
| GB_UA_C29                              | Transcriptional unit for the constitutive expression of a monoclonal antibody with the gamma1 heavy chain and the kappa light chain against the human TNF-alpha.                                                                                                                                          |
