# Supplementary material for: GB3.0: a platform for plant bio-design that connects functional DNA elements with associated biological data
Source: Oxford University Press journal article supplement (doi:10.1093/nar/gkw1326), 2016-12-21
Supplement: gkw1326_supplementary_data.zip [file gkw1326_supplementary_data.zip]

Archive with 1 entries (1 files):
- nar-03423-z-2016-File007.pdf
